# Supplementary material
Source: Springer Nature journal article supplement (https://www.springermedizin.de/resource/supplementary/12879_2011_1714_MOESM2_ESM.pdf/9443638)

(a)

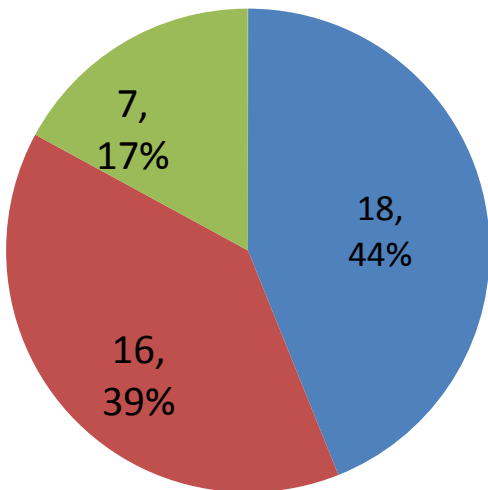

(b)

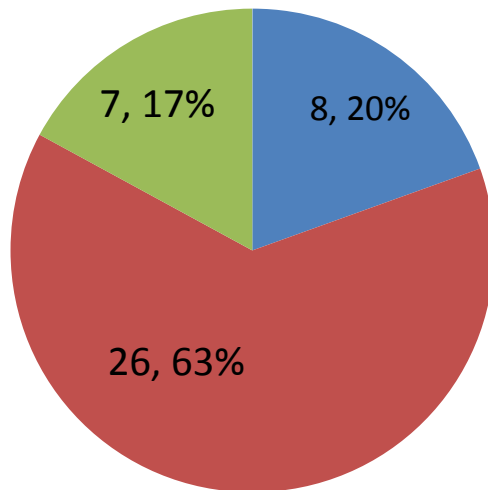

(c)

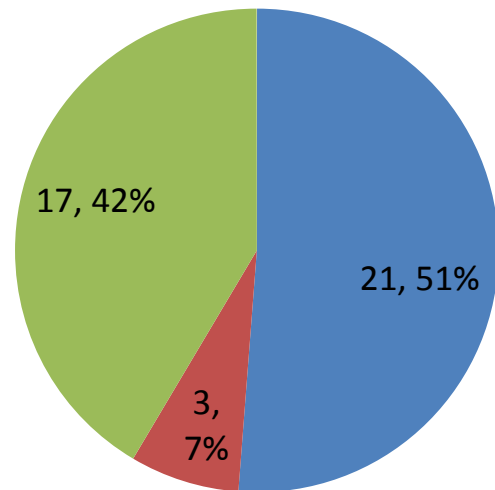

 Adequate

 Partially Adequate

 Not Adequate

Supplement: MOESM2 [file 9443638]
